# Supplementary material
Source: Springer Nature journal article supplement (https://www.springermedizin.de/resource/supplementary/12875_2013_919_MOESM2_ESM.pdf/9435396)
Supplement: MOESM2 [file 9435396]

**Table 1: Visit Characteristics (N = 962)<sup>1</sup>**

| <b>Characteristic</b>   | <b>Mean (SD)</b> |
|-------------------------|------------------|
| Age                     | 45 (12)          |
| Sex                     | <b>N (%)</b>     |
| Female                  | 710 (74)         |
| Male                    | 252 (26)         |
| Race and Ethnicity      |                  |
| White, non-Latino       | 437 (45)         |
| Black, non-Latino       | 278 (29)         |
| Latino                  | 160 (17)         |
| Asian                   | 53 (6)           |
| Unavailable/Other       | 34 (4)           |
| Insurance Status        |                  |
| Private                 | 683 (71)         |
| Medicaid                | 182 (19)         |
| Medicare                | 81 (8)           |
| Self-Pay                | 15 (2)           |
| Co-morbidities          |                  |
| Diabetes                | 108 (11)         |
| Cancer                  | 51 (5)           |
| Rheumatologic disease   | 39 (5)           |
| Mild liver disease      | 31 (3)           |
| Myocardial infarction   | 19 (2)           |
| Cerebrovascular disease | 17 (2)           |
| Renal disease           | 15 (2)           |

<sup>1</sup> Some groups may not add up to 100% because of rounding.
